# Supplementary material for: Integrative Transcriptome and Metabolome Profiles Reveal Common and Unique Pathways Involved in Seed Initial Imbibition Under Artificial and Natural Salt Stresses During Germination of Halophyte Quinoa
Source: Front Plant Sci. 2022 Apr 12;13:853326. doi: 10.3389/fpls.2022.853326 (PMC9039654; doi:10.3389/fpls.2022.853326)
Supplement: Supplementary Table 13 — DEGs and DAMs involved in ascorbate and aldarate metabolism. [file Table_13.xlsx]

## Sheet: DEGs
DEGs involved in ascorbate and aldarate metabolism
Pathway ID	Gene ID	KO ID	NR description	DEGs in SC vs CK					DEGs in BW vs CK
				FoldChange	log2FoldChange	P value	FDR	Regulated	FoldChange	log2FoldChange	P value	FDR	Regulated
ko00053	LOC110717323	K00012 UDPglucose 6-dehydrogenase [EC:1.1.1.22] | (RefSeq) UDP-glucose 6-dehydrogenase 1 (A)	UDP-glucose 6-dehydrogenase 1 [Chenopodium quinoa]	2.641	1.401	5.37117e-13	1.11998e-11	up	2.249	1.17	4.73539e-44	1.31908e-42	up
ko00053	LOC110722102	K00012 UDPglucose 6-dehydrogenase [EC:1.1.1.22] | (RefSeq) UDP-glucose 6-dehydrogenase 4-like (A)	UDP-glucose 6-dehydrogenase 4-like [Chenopodium quinoa]	2.41	1.269	7.76501e-10	1.05235e-08	up	2.011	1.008	2.34359e-34	4.48456e-33	up
ko00053	LOC110735086	K00012 UDPglucose 6-dehydrogenase [EC:1.1.1.22] | (RefSeq) UDP-glucose 6-dehydrogenase 1 (A)	UDP-glucose 6-dehydrogenase 1 [Chenopodium quinoa]	2.569	1.361	1.73225e-12	3.39494e-11	up	2.131	1.091	1.3788e-51	5.0727e-50	up
ko00053	LOC110737278	K00012 UDPglucose 6-dehydrogenase [EC:1.1.1.22] | (RefSeq) UDP-glucose 6-dehydrogenase 1-like (A)	UDP-glucose 6-dehydrogenase 1-like [Chenopodium quinoa]	8.429	3.075	6.94293e-05	0.000354121	up	6.12	2.614	0.000956283	0.00241567	up
ko00053	LOC110686138	K00012 UDPglucose 6-dehydrogenase [EC:1.1.1.22] | (RefSeq) UDP-glucose 6-dehydrogenase 4-like (A)	UDP-glucose 6-dehydrogenase 4-like [Chenopodium quinoa]	2.209	1.143	4.62797e-17	1.52088e-15	up
ko00053	LOC110700413	K00128 aldehyde dehydrogenase (NAD+) [EC:1.2.1.3] | (RefSeq) aldehyde dehydrogenase family 2 member B4, mitochondrial-like (A)	aldehyde dehydrogenase family 2 member B4, mitochondrial-like [Chenopodium quinoa]	0.441	-1.181	1.08091e-08	1.20393e-07	down	0.452	-1.147	7.15514e-15	5.26285e-14	down
ko00053	LOC110736643	K00128 aldehyde dehydrogenase (NAD+) [EC:1.2.1.3] | (RefSeq) aldehyde dehydrogenase family 3 member H1-like isoform X1 (A)	aldehyde dehydrogenase family 3 member H1-like isoform X1 [Chenopodium quinoa]	2.743	1.456	6.95449e-08	6.71055e-07	up	2.838	1.505	4.89923e-09	2.29805e-08	up
ko00053	LOC110738449	K00128 aldehyde dehydrogenase (NAD+) [EC:1.2.1.3] | (RefSeq) aldehyde dehydrogenase family 2 member B7, mitochondrial-like isoform X1 (A)	aldehyde dehydrogenase family 2 member B4, mitochondrial-like [Chenopodium quinoa]	2.069	1.049	0.0127055	0.0335862	up
ko00053	LOC110685890	K00128 aldehyde dehydrogenase (NAD+) [EC:1.2.1.3] | (RefSeq) aldehyde dehydrogenase family 3 member F1-like (A)	LOW QUALITY PROTEIN: aldehyde dehydrogenase family 3 member F1-like [Chenopodium quinoa]	0.467	-1.099	0.0113837	0.0305468	down
ko00053	LOC110694134	K00128 aldehyde dehydrogenase (NAD+) [EC:1.2.1.3] | (RefSeq) aldehyde dehydrogenase family 2 member B7, mitochondrial-like (A)	aldehyde dehydrogenase family 2 member B7, mitochondrial-like [Chenopodium quinoa]	8.936	3.16	1.52788e-32	1.80038e-30	up	9.081	3.183	1.77955e-65	9.70613e-64	up
ko00053	LOC110694135	K00128 aldehyde dehydrogenase (NAD+) [EC:1.2.1.3] | (RefSeq) aldehyde dehydrogenase family 2 member B7, mitochondrial-like isoform X1 (A)	aldehyde dehydrogenase family 2 member B7, mitochondrial-like isoform X1 [Chenopodium quinoa]	0.271	-1.885	2.61184e-31	2.87189e-29	down	0.291	-1.779	7.92407e-93	8.2848e-91	down
ko00053	LOC110696022	K00128 aldehyde dehydrogenase (NAD+) [EC:1.2.1.3] | (RefSeq) aldehyde dehydrogenase family 3 member F1-like (A)	aldehyde dehydrogenase family 3 member F1-like [Chenopodium quinoa]	2.25	1.17	0.0157211	0.0402662	up	2.534	1.341	0.00328196	0.00750191	up
ko00053	LOC110685874	K00128 aldehyde dehydrogenase (NAD+) [EC:1.2.1.3] | (RefSeq) aldehyde dehydrogenase family 3 member F1-like (A)	LOW QUALITY PROTEIN: aldehyde dehydrogenase family 3 member F1-like [Chenopodium quinoa]						0.474	-1.077	0.00212072	0.00502606	down
ko00053	LOC110704611	K00423 L-ascorbate oxidase [EC:1.10.3.3] | (RefSeq) L-ascorbate oxidase homolog (A)	monocopper oxidase-like protein SKU5 [Chenopodium quinoa]	3.048	1.608	1.21971e-06	9.17513e-06	up	4.181	2.064	2.36936e-23	2.80426e-22	up
ko00053	LOC110717796	K00423 L-ascorbate oxidase [EC:1.10.3.3] | (RefSeq) L-ascorbate oxidase-like (A)	L-ascorbate oxidase-like [Chenopodium quinoa]	7.21	2.85	0.00337388	0.0107628	up
ko00053	LOC110732740	K00423 L-ascorbate oxidase [EC:1.10.3.3] | (RefSeq) L-ascorbate oxidase homolog (A)	monocopper oxidase-like protein SKU5 [Chenopodium quinoa]	2.74	1.454	1.79602e-05	0.000105161	up	2.873	1.522	3.27927e-22	3.64968e-21	up
ko00053	LOC110736359	K00423 L-ascorbate oxidase [EC:1.10.3.3] | (RefSeq) L-ascorbate oxidase homolog (A)	L-ascorbate oxidase homolog [Chenopodium quinoa]	0.38	-1.397	0.00299965	0.00972917	down	0.465	-1.104	0.00881418	0.0185272	down
ko00053	LOC110740325	K00423 L-ascorbate oxidase [EC:1.10.3.3] | (RefSeq) L-ascorbate oxidase-like (A)	L-ascorbate oxidase-like [Chenopodium quinoa]	3.518	1.815	0.00626661	0.0182798	up	3.916	1.969	3.25217e-05	0.000101576	up
ko00053	LOC110701028	K00423 L-ascorbate oxidase [EC:1.10.3.3] | (RefSeq) L-ascorbate oxidase homolog (A)	L-ascorbate oxidase homolog [Chenopodium quinoa]						0.348	-1.521	7.39882e-05	0.000220747	down
ko00053	LOC110701606	K00434 L-ascorbate peroxidase [EC:1.11.1.11] | (RefSeq) L-ascorbate peroxidase, cytosolic (A)	L-ascorbate peroxidase, cytosolic [Chenopodium quinoa]	4.93	2.302	4.08843e-32	4.65798e-30	up	4.736	2.244	5.38824e-90	5.37419e-88	up
ko00053	LOC110705037	K00434 L-ascorbate peroxidase [EC:1.11.1.11] | (RefSeq) putative L-ascorbate peroxidase 6 (A)	putative L-ascorbate peroxidase 6 [Chenopodium quinoa]	0.418	-1.26	1.35358e-09	1.76732e-08	down
ko00053	LOC110709763	K00434 L-ascorbate peroxidase [EC:1.11.1.11] | (RefSeq) probable L-ascorbate peroxidase 6, chloroplastic isoform X1 (A)	probable L-ascorbate peroxidase 6, chloroplastic isoform X1 [Chenopodium quinoa]	0.481	-1.057	3.80981e-15	1.02421e-13	down	0.468	-1.095	5.47954e-45	1.58878e-43	down
ko00053	LOC110711843	K00434 L-ascorbate peroxidase [EC:1.11.1.11] | (RefSeq) L-ascorbate peroxidase, cytosolic (A)	L-ascorbate peroxidase, cytosolic [Chenopodium quinoa]	2.569	1.361	3.51249e-12	6.62973e-11	up	2.265	1.179	2.82087e-58	1.26737e-56	up
ko00053	LOC110733589	K00434 L-ascorbate peroxidase [EC:1.11.1.11] | (RefSeq) putative L-ascorbate peroxidase 6 (A)	putative L-ascorbate peroxidase 6 [Chenopodium quinoa]	0.314	-1.672	1.46962e-24	9.87363e-23	down	0.384	-1.381	3.79064e-32	6.58181e-31	down
ko00053	LOC110694728	K00434 L-ascorbate peroxidase [EC:1.11.1.11] | (RefSeq) L-ascorbate peroxidase 5, peroxisomal-like (A)	L-ascorbate peroxidase 5, peroxisomal-like [Chenopodium quinoa]	0.056	-4.158	7.27284e-05	0.000369107	down
ko00053	LOC110694729	K00434 L-ascorbate peroxidase [EC:1.11.1.11] | (RefSeq) L-ascorbate peroxidase 3-like (A)	L-ascorbate peroxidase 3-like [Chenopodium quinoa]	0.012	-6.411	0.000300603	0.00129621	down	0.011	-6.52	7.77919e-05	0.000231247	down
ko00053	LOC110701631	K00434 L-ascorbate peroxidase [EC:1.11.1.11] | (RefSeq) L-ascorbate peroxidase 5, peroxisomal-like (A)	L-ascorbate peroxidase 5, peroxisomal-like [Chenopodium quinoa]						0.497	-1.008	0.019139	0.0372831	down
ko00053	LOC110701632	K00434 L-ascorbate peroxidase [EC:1.11.1.11] | (RefSeq) L-ascorbate peroxidase 3-like (A)	L-ascorbate peroxidase 3-like [Chenopodium quinoa]						21.226	4.408	0.0019296	0.00461068	up
ko00053	LOC110715390	K00469 inositol oxygenase [EC:1.13.99.1] | (RefSeq) inositol oxygenase 1-like isoform X1 (A)	inositol oxygenase 1-like isoform X1 [Chenopodium quinoa]	0.055	-4.173	1.96476e-63	1.01804e-60	down	0.083	-3.593	2.62081e-80	2.0816e-78	down
ko00053	LOC110729903	K00469 inositol oxygenase [EC:1.13.99.1] | (RefSeq) inositol oxygenase 1-like (A)	inositol oxygenase 1-like [Chenopodium quinoa]	0.272	-1.879	3.76816e-07	3.14984e-06	down	0.219	-2.189	4.68994e-18	4.17099e-17	down
ko00053	LOC110690892	K00469 inositol oxygenase [EC:1.13.99.1] | (RefSeq) inositol oxygenase 1-like (A)	inositol oxygenase 1-like [Chenopodium quinoa]	0.099	-3.34	0.000525579	0.00212416	down	0.159	-2.653	0.00136994	0.00336557	down
ko00053	LOC110722597	K08232 monodehydroascorbate reductase (NADH) [EC:1.6.5.4] | (RefSeq) monodehydroascorbate reductase 5, mitochondrial-like (A)	monodehydroascorbate reductase 5, mitochondrial-like [Chenopodium quinoa]	2.085	1.06	4.78082e-06	3.19044e-05	up
ko00053	LOC110728081	K16190 glucuronokinase [EC:2.7.1.43] | (RefSeq) glucuronokinase 1-like (A)	glucuronokinase 1-like [Chenopodium quinoa]	0.425	-1.235	2.75636e-05	0.000154161	down	0.477	-1.069	1.23455e-10	6.58527e-10	down
ko00053	LOC110685042	K17744 L-galactose dehydrogenase [EC:1.1.1.316] | (RefSeq) L-galactose dehydrogenase-like (A)	L-galactose dehydrogenase-like [Chenopodium quinoa]	0.337	-1.568	5.08462e-07	4.13159e-06	down
ko00053	LOC110698430	K18649 inositol-phosphate phosphatase / L-galactose 1-phosphate phosphatase / histidinol-phosphatase [EC:3.1.3.25 3.1.3.93 3.1.3.15] | (RefSeq) bifunctional phosphatase IMPL2, chloroplastic-like isoform X1 (A)	bifunctional phosphatase IMPL2, chloroplastic-like isoform X1 [Chenopodium quinoa]	2.072	1.051	0.000155662	0.00072574	up
ko00053	LOC110706021	K21888 glutathione dehydrogenase/transferase [EC:1.8.5.1 2.5.1.18] | (RefSeq) glutathione S-transferase DHAR2-like (A)	glutathione S-transferase DHAR2-like [Chenopodium quinoa]	0.364	-1.459	2.14455e-08	2.27923e-07	down	0.275	-1.861	1.32424e-133	2.90127e-131	down
ko00053	LOC110735130	K21888 glutathione dehydrogenase/transferase [EC:1.8.5.1 2.5.1.18] | (RefSeq) glutathione S-transferase DHAR3, chloroplastic-like (A)	glutathione S-transferase DHAR3, chloroplastic-like [Chenopodium quinoa]	0.429	-1.221	3.87952e-05	0.000210143	down	0.47	-1.088	5.40518e-12	3.2172e-11	down
ko00053	LOC110696661	K21888 glutathione dehydrogenase/transferase [EC:1.8.5.1 2.5.1.18] | (RefSeq) glutathione S-transferase DHAR2-like (A)	glutathione S-transferase DHAR2-like [Chenopodium quinoa]						0.409	-1.29	4.12535e-40	9.87602e-39	down
Note:
The yellow background indicated DEGs identified in SC vs CK,
the blue background indicated DEGs identified in BW vs CK,
and the red background indicated DEGs identified both in SC vs CK and BW vs CK.

## Sheet: DAMs
DAMs involved in ascorbate and aldarate metabolism
Index	Compounds	Class I	Class II	DAMs in SC vs CK				DAMs in BW vs CK
				VIP	Fold Change	Log2FC	Type	VIP	Fold Change	Log2FC	Type
Zmyn000108	D-Saccharic acid	Others	Saccharides and Alcohols	1.2996	0.163497	-2.61266	down	1.27026	0.152494	-2.71317	down
pme0516	Inositol	Others	Saccharides and Alcohols	1.31372	0.338781	-1.56158	down	1.22693	0.387053	-1.3694	down
pmb2922	Uridine 5'-diphospho-D-glucose	Nucleotides and derivatives	Nucleotides and derivatives	1.30486	314.414	8.29652	up	1.27512	359.676	8.49055	up
Zmpn000199	D-Galactaric acid	Others	Saccharides and Alcohols	1.30459	0.136837	-2.86947	down	1.26731	0.13194	-2.92204	down
pme3705	D-Glucoronic acid	Others	Saccharides and Alcohols	1.29725	0.294861	-1.76189	down	1.26428	0.261504	-1.93509	down
mws1189	D-Galacturonic acid	Organic acids	Organic acids	1.28468	0.255764	-1.96711	down	1.26261	0.216296	-2.20892	down
Note:
The red background indicated DAMs detected both in SC vs CK and BW vs CK.
